# Supplementary material
Source: PubMed Central journal article supplement (PMC5813499)

|                                                                                         |                                  |                                        |
|-----------------------------------------------------------------------------------------|----------------------------------|----------------------------------------|
| <b>Formula</b> C <sub>23</sub> H <sub>25</sub> BrN <sub>2</sub> O <sub>5</sub>          |                                  | <b>FW</b> 489.3590                     |
| <b>Acquisition Time (sec)</b> 3.9846                                                    | <b>Date</b> 20 May 2012 15:43:28 | <b>Date Stamp</b> 20 May 2012 15:43:28 |
| <b>File Name</b> C:\Documents and Settings\ss176831\Desktop\2SS-Pg153-16-CDCl3-H1\1\fid |                                  |                                        |
| <b>Nucleus</b> 1H                                                                       | <b>Number of Transients</b> 30   | <b>Origin</b> spect                    |
| <b>Owner</b> nmrsu                                                                      | <b>Points Count</b> 32768        | <b>Pulse Sequence</b> zg30             |
| <b>SW(cyclical) (Hz)</b> 8223.68                                                        | <b>Solvent</b> CHLOROFORM-d      | <b>Spectrum Offset (Hz)</b> 2460.7051  |
| <b>Spectrum Type</b> STANDARD                                                           | <b>Sweep Width (Hz)</b> 8223.43  | <b>Temperature (degree C)</b> 21.418   |

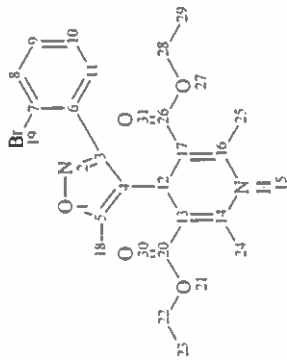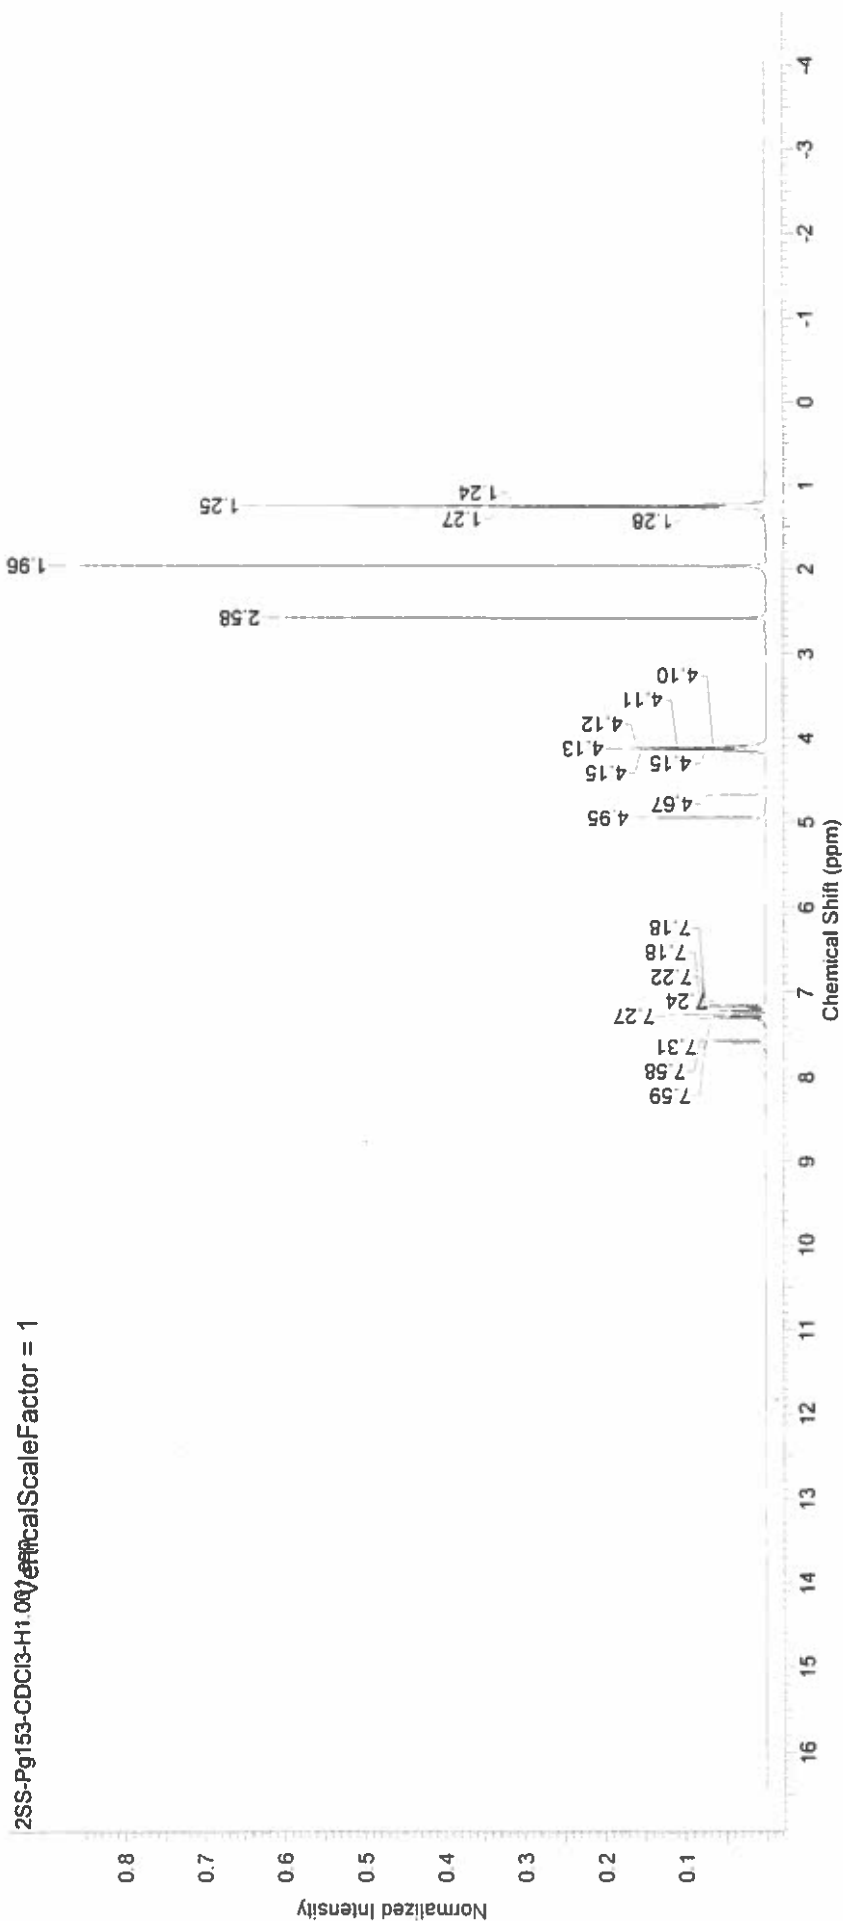

|                                                                         |                                                                          |                         |                      |
|-------------------------------------------------------------------------|--------------------------------------------------------------------------|-------------------------|----------------------|
| Formula C <sub>23</sub> H <sub>23</sub> BrN <sub>2</sub> O <sub>5</sub> |                                                                          | FW                      | 489.3590             |
| Acquisition Time (sec)                                                  | 1.3631                                                                   | Date                    | 20 May 2012 19:46:40 |
| File Name                                                               | C:\Documents and Settings\176831\Desktop\2SS-Pg153-16-CDCL3-C13\data\11r |                         |                      |
| Nucleus                                                                 | 13C                                                                      | Number of Transients    | 2000                 |
| Owner                                                                   | nrsu                                                                     | Points Count            | 32768                |
| SW(cyclical) (Hz)                                                       | 24038.46                                                                 | Solvent                 | CHLOROFORM-d         |
| Spectrum Type                                                           | STANDARD                                                                 | Sweep Width (Hz)        | 24037.73             |
|                                                                         |                                                                          | Temperature (degrees C) | 23.571               |

|                       |                      |
|-----------------------|----------------------|
| Date Stamp            | 20 May 2012 19:46:40 |
| Frequency (MHz)       | 100.63               |
| Original Points Count | 32768                |
| Receiver Gain         | 203.00               |
| Spectrum Offset (Hz)  | 10062.0947           |

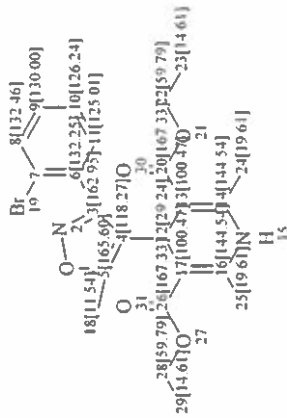

2SS-PG153-CDCL3-C13 01.0015 Scale Factor = 1

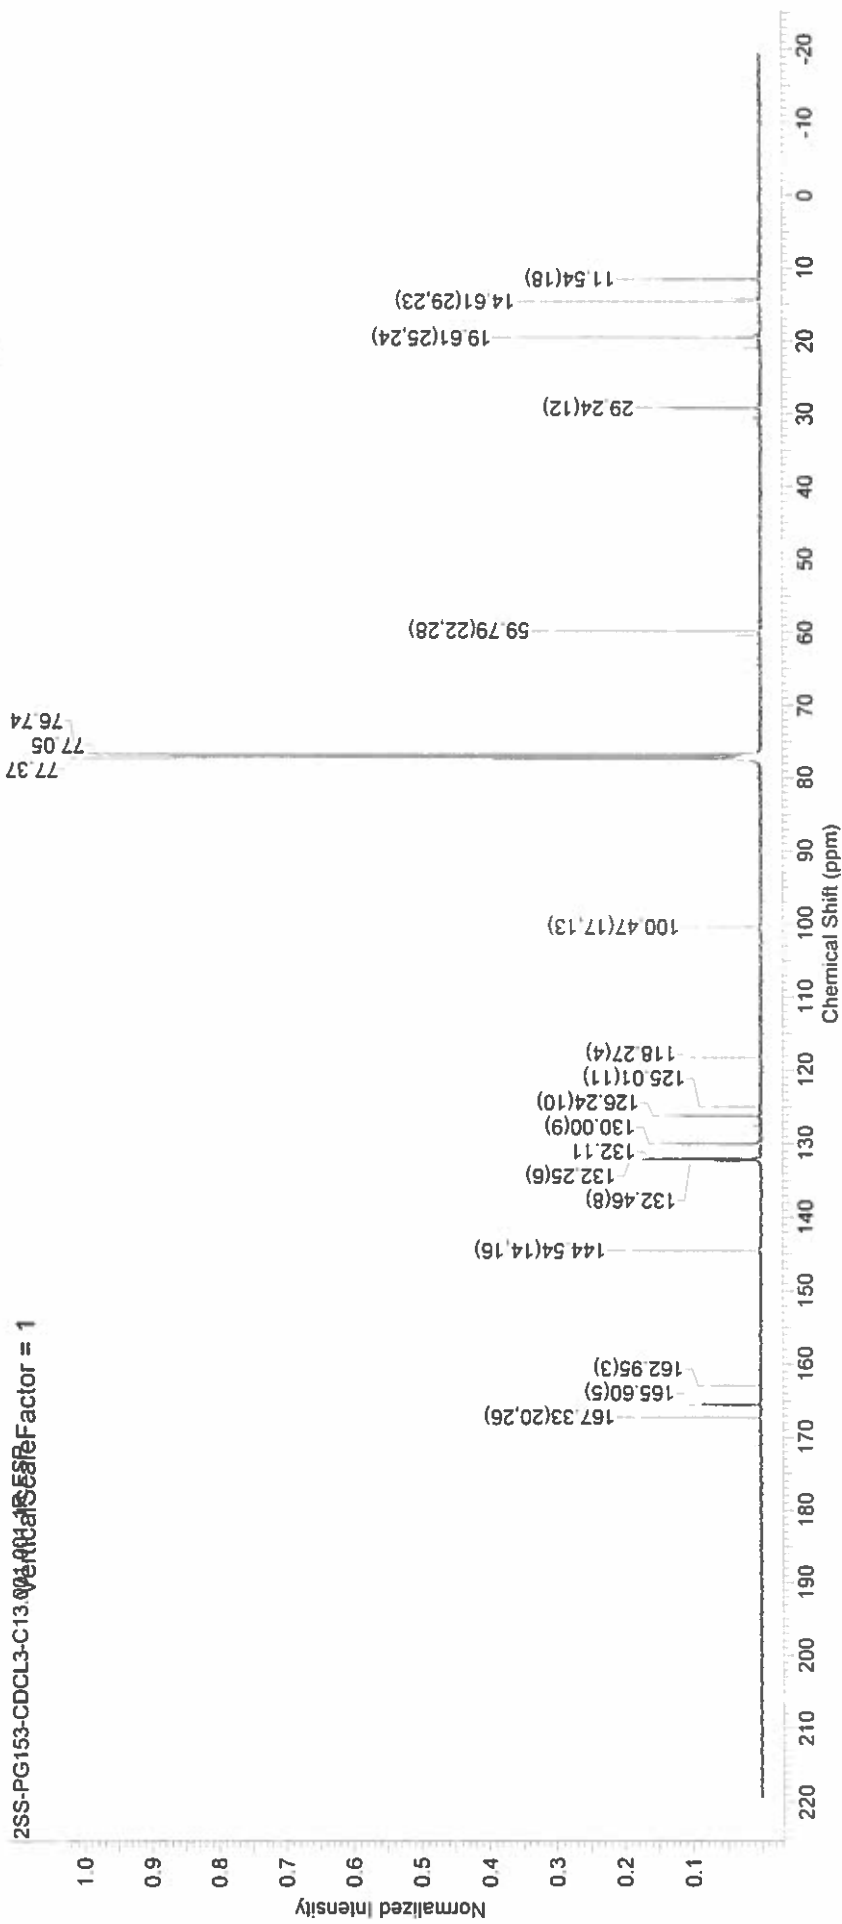

Formula  $C_{23}H_{25}BrN_2O_5$  FW 489.3590

|                        |                                                                           |                        |                      |
|------------------------|---------------------------------------------------------------------------|------------------------|----------------------|
| Acquisition Time (sec) | 3.9846                                                                    | Date                   | 11 May 2012 11:08:16 |
| File Name              | C:\Documents and Settings\ss176831\Desktop\2SS-Pg147-CDCl3-H11\pdata\111r |                        |                      |
| Nucleus                | 1H                                                                        | Number of Transients   | 100                  |
| Owner                  | nmisu                                                                     | Points Count           | 65536                |
| SW(cyclical) (Hz)      | 8223.68                                                                   | Solvent                | CHLOROFORM-d         |
| Spectrum Type          | STANDARD                                                                  | Sweep Width (Hz)       | 8223.56              |
|                        |                                                                           | Temperature (degree C) | 22.531               |

|                       |                      |
|-----------------------|----------------------|
| Date Stamp            | 11 May 2012 11:08:16 |
| Frequency (MHz)       | 400.18               |
| Original Points Count | 32768                |
| Receiver Gain         | 181.00               |
| Spectrum Offset (Hz)  | 2471.2747            |

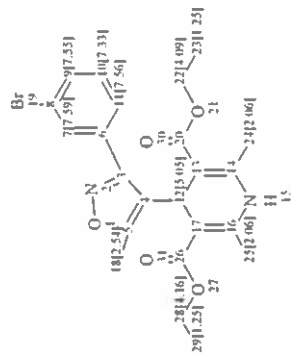

2SS-PG147-CDCl3-H11.001.0914555.1eFactor = 1

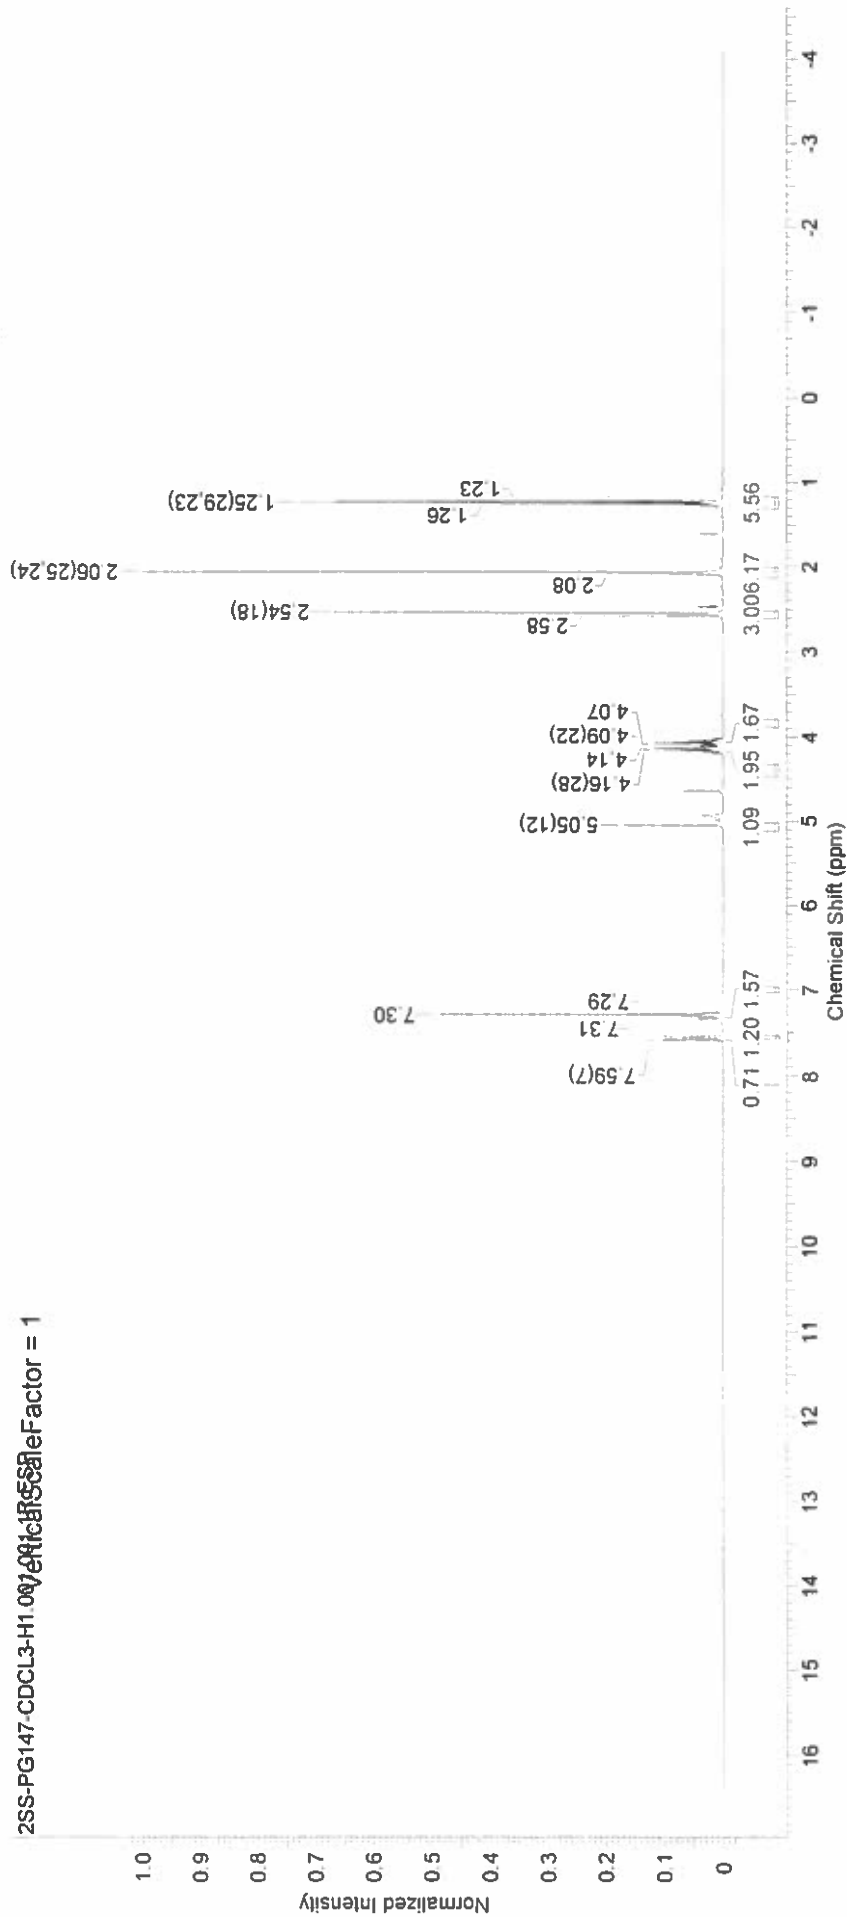



Formula C<sub>23</sub>H<sub>25</sub>BrN<sub>2</sub>O<sub>5</sub> FW 489.3590

|                        |                                                                    |                        |                      |
|------------------------|--------------------------------------------------------------------|------------------------|----------------------|
| Acquisition Time (sec) | 3.9846                                                             | Date                   | 16 Nov 2012 14:52:00 |
| File Name              | C:\Documents and Settings\ss176831\Desktop\2SS-SS-16-CDCI3-H1\1fid |                        |                      |
| Nucleus                | 1H                                                                 | Number of Transients   | 100                  |
| Owner                  | nmsu                                                               | Points Count           | 32768                |
| SW(cyclical) (Hz)      | 8223.68                                                            | Solvent                | CHLOROFORM-d         |
| Spectrum Type          | STANDARD                                                           | Sweep Width (Hz)       | 8223.43              |
|                        |                                                                    | Temperature (degree C) | 23.269               |

|                       |                      |
|-----------------------|----------------------|
| Date Stamp            | 16 Nov 2012 14:52:00 |
| Frequency (MHz)       | 400.18               |
| Original Points Count | 32768                |
| Receiver Gain         | 181.00               |
| Spectrum Offset (Hz)  | 2460.2031            |

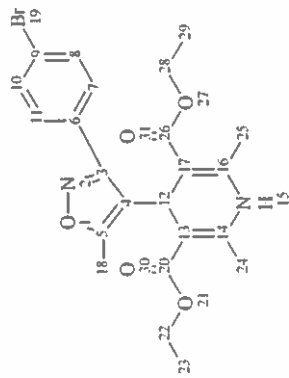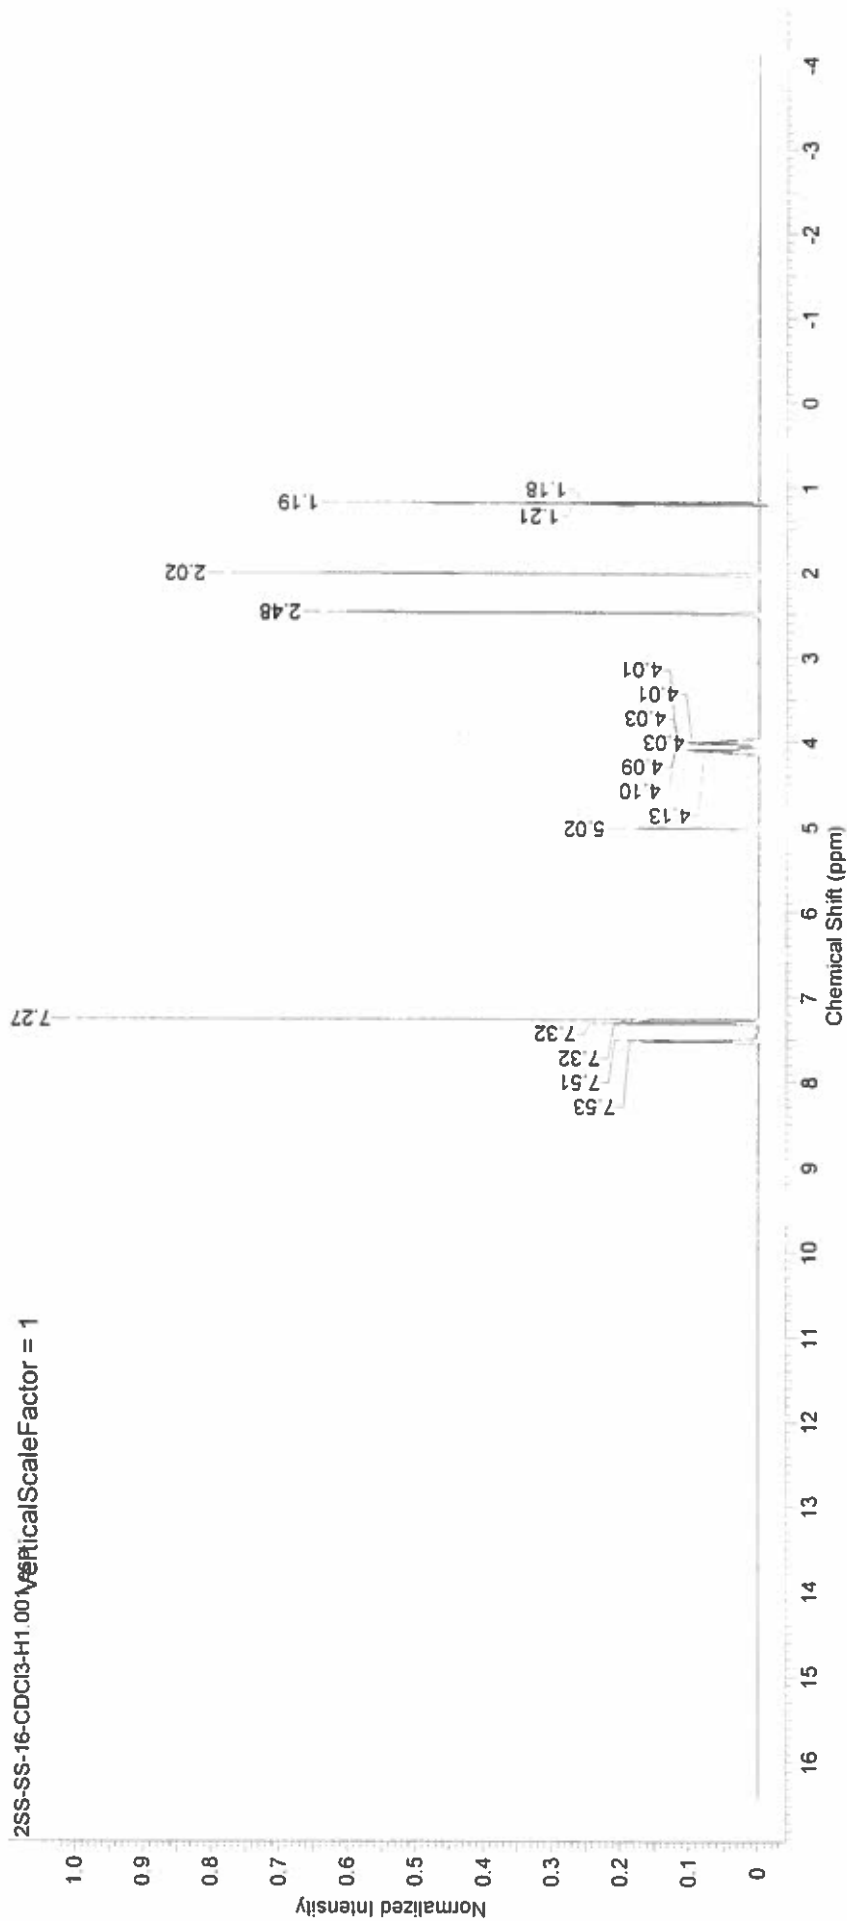

Formula  $C_{23}H_{13}BrN_2O_5$  FW 489.3590

|                        |                                                                     |                      |                      |
|------------------------|---------------------------------------------------------------------|----------------------|----------------------|
| Acquisition Time (sec) | 1.3631                                                              | Date                 | 17 Nov 2012 09:42:40 |
| File Name              | C:\Documents and Settings\ss176831\Desktop\2SS-SS-16-CDCI3-C13\1fid |                      |                      |
| Nucleus                | 13C                                                                 | Number of Transients | 2000                 |
| Origin                 | Origin                                                              |                      |                      |
| Owner                  | nmsu                                                                | Points Count         | 32768                |
| Pulse Sequence         | zpgg30                                                              |                      |                      |
| SW(cyclical) (Hz)      | 24038.46                                                            | Solvent              | CHLOROFORM-d         |
| Spectrum Type          | STANDARD                                                            | Sweep Width (Hz)     | 24037.73             |
| Temperature (degree C) | 24.928                                                              |                      |                      |

|                       |                      |
|-----------------------|----------------------|
| Date Stamp            | 17 Nov 2012 09:42:40 |
| Frequency (MHz)       | 100.63               |
| Original Points Count | 32768                |
| Receiver Gain         | 203.00               |
| Spectrum Offset (Hz)  | 10062.0947           |

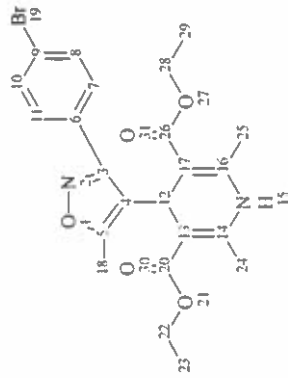

2SS-SS-16-CDCI3-C13 VerticalScaleFactor = 1

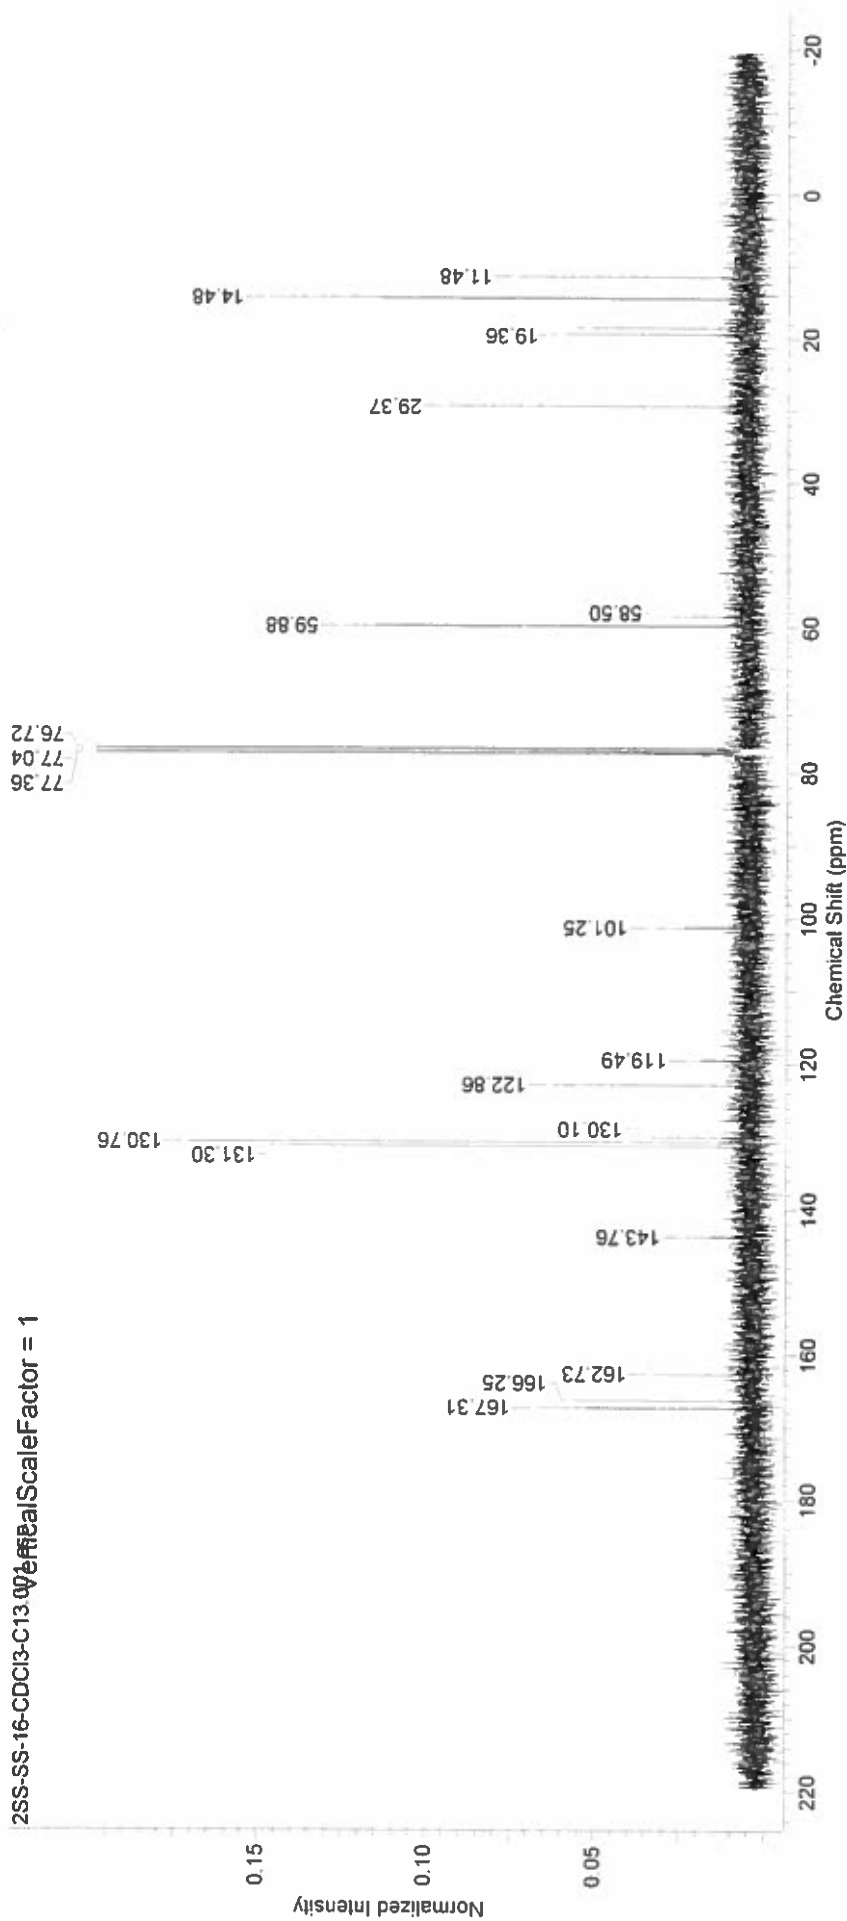

Formula C<sub>61</sub>H<sub>74</sub>N<sub>10</sub>O<sub>15</sub> FW 1187.2983

| Acquisition Time (sec) | 2.0486                                                                         | Comment              | Std proton | Date                  | Jan 11 2011  | Date Stamp             | Jan 11 2011 |
|------------------------|--------------------------------------------------------------------------------|----------------------|------------|-----------------------|--------------|------------------------|-------------|
| File Name              | C:\Documents and Settings\ss176831\Desktop\NMR\SS-Pg129-33-31-CDCI3-H1.fid\fid |                      |            |                       |              | Frequency (MHz)        | 499.80      |
| Nucleus                | 1H                                                                             | Number of Transients | 36         | Original Points Count | 16415        | Points Count           | 32768       |
| Pulse Sequence         | s2pul                                                                          | Receiver Gain        | 32.00      | Solvent               | CHLOROFORM-d |                        |             |
| Spectrum Offset (Hz)   | 2998.7666                                                                      | Spectrum Type        | STANDARD   | Sweep Width (Hz)      | 8012.82      | Temperature (degree C) | 30.000      |

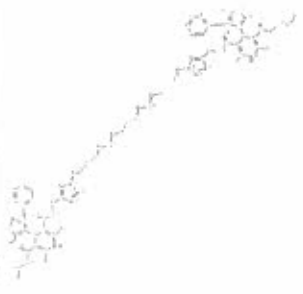

SS-Pg129-CDCI3-H1 esp VerticalScaleFactor = 1

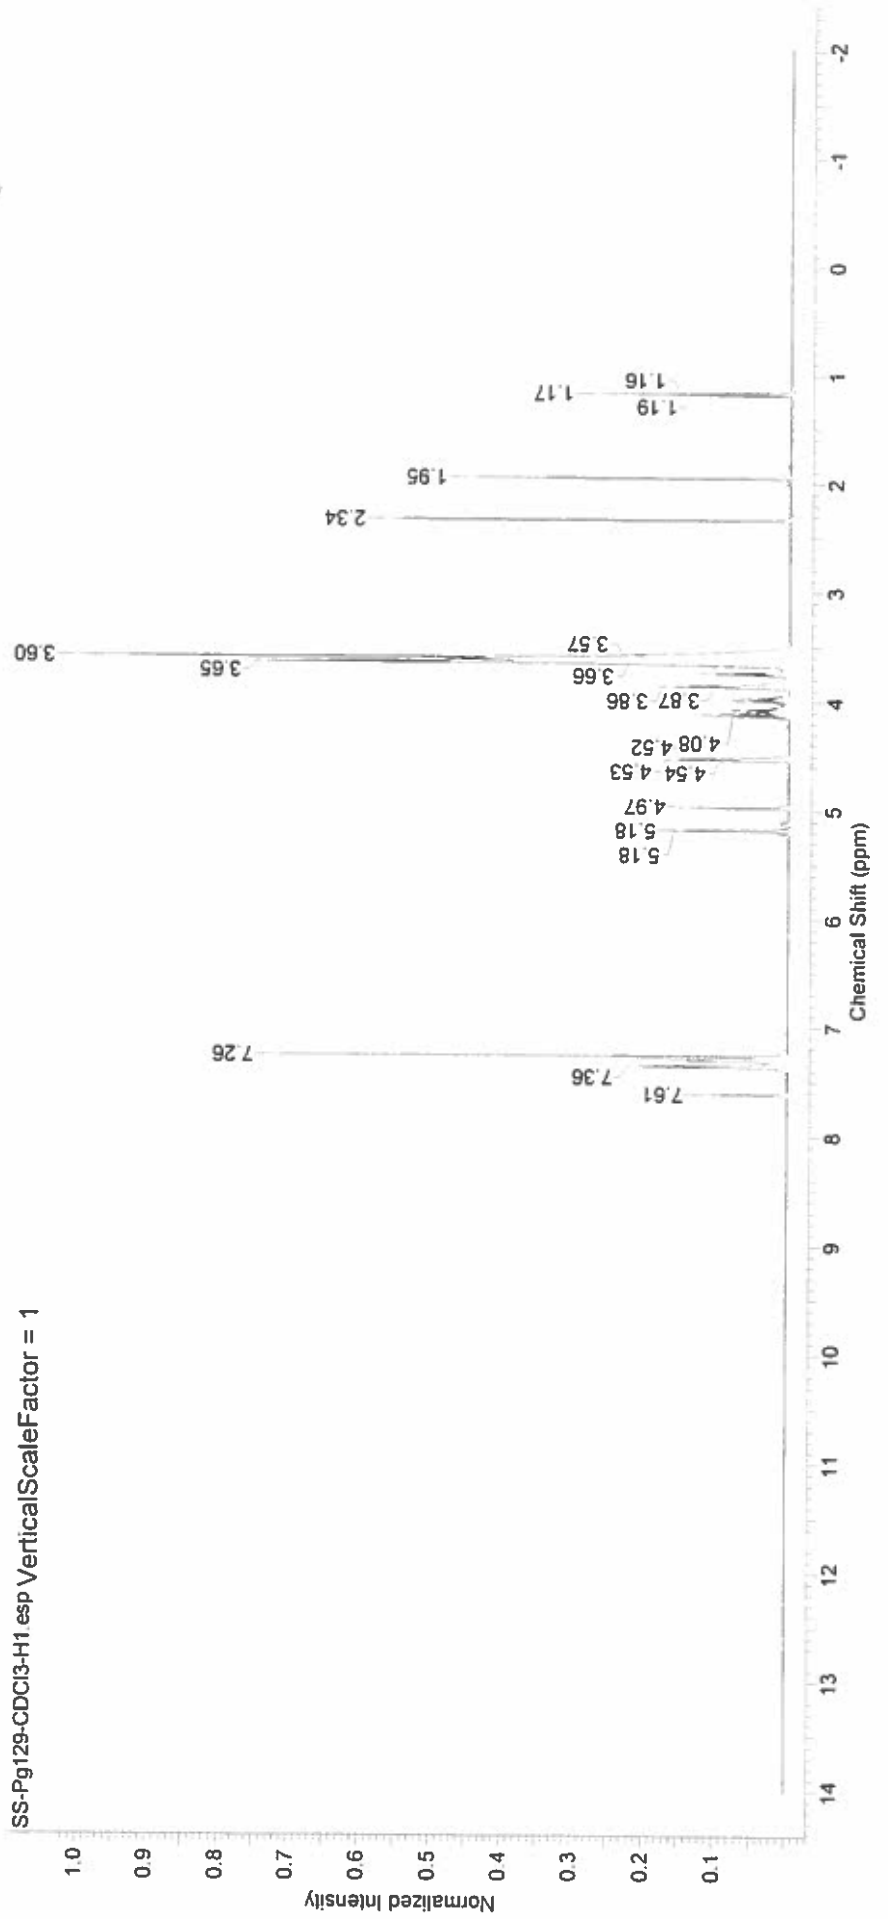





|                        |                                                                                 |                        |                      |
|------------------------|---------------------------------------------------------------------------------|------------------------|----------------------|
| Formula                | C <sub>60</sub> H <sub>70</sub> Br <sub>2</sub> N <sub>10</sub> O <sub>15</sub> | FW                     | 1331.0638            |
| Acquisition Time (sec) | 3.9846                                                                          | Date                   | 31 Jul 2012 09:49:20 |
| File Name              | C:\Documents and Settings\ss176831\Desktop\2SS-Pg63-7-CDCl3-H1110.fid           |                        |                      |
| Nucleus                | 1H                                                                              | Number of Transients   | 30                   |
| Owner                  | nmsu                                                                            | Points Count           | 32768                |
| SW(cyclical) (Hz)      | 8223.68                                                                         | Solvent                | CHLOROFORM-d         |
| Spectrum Type          | STANDARD                                                                        | Sweep Width (Hz)       | 8223.43              |
|                        |                                                                                 | Temperature (degree C) | 22.988               |

|                       |                      |
|-----------------------|----------------------|
| Date Stamp            | 31 Jul 2012 09:49:20 |
| Frequency (MHz)       | 400.18               |
| Original Points Count | 32768                |
| Receiver Gain         | 128.00               |
| Spectrum Offset (Hz)  | 2460.2031            |

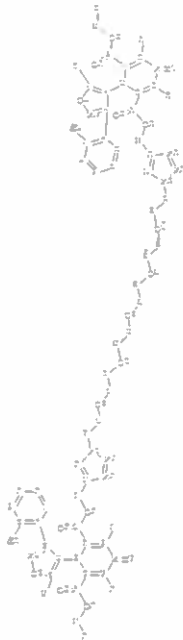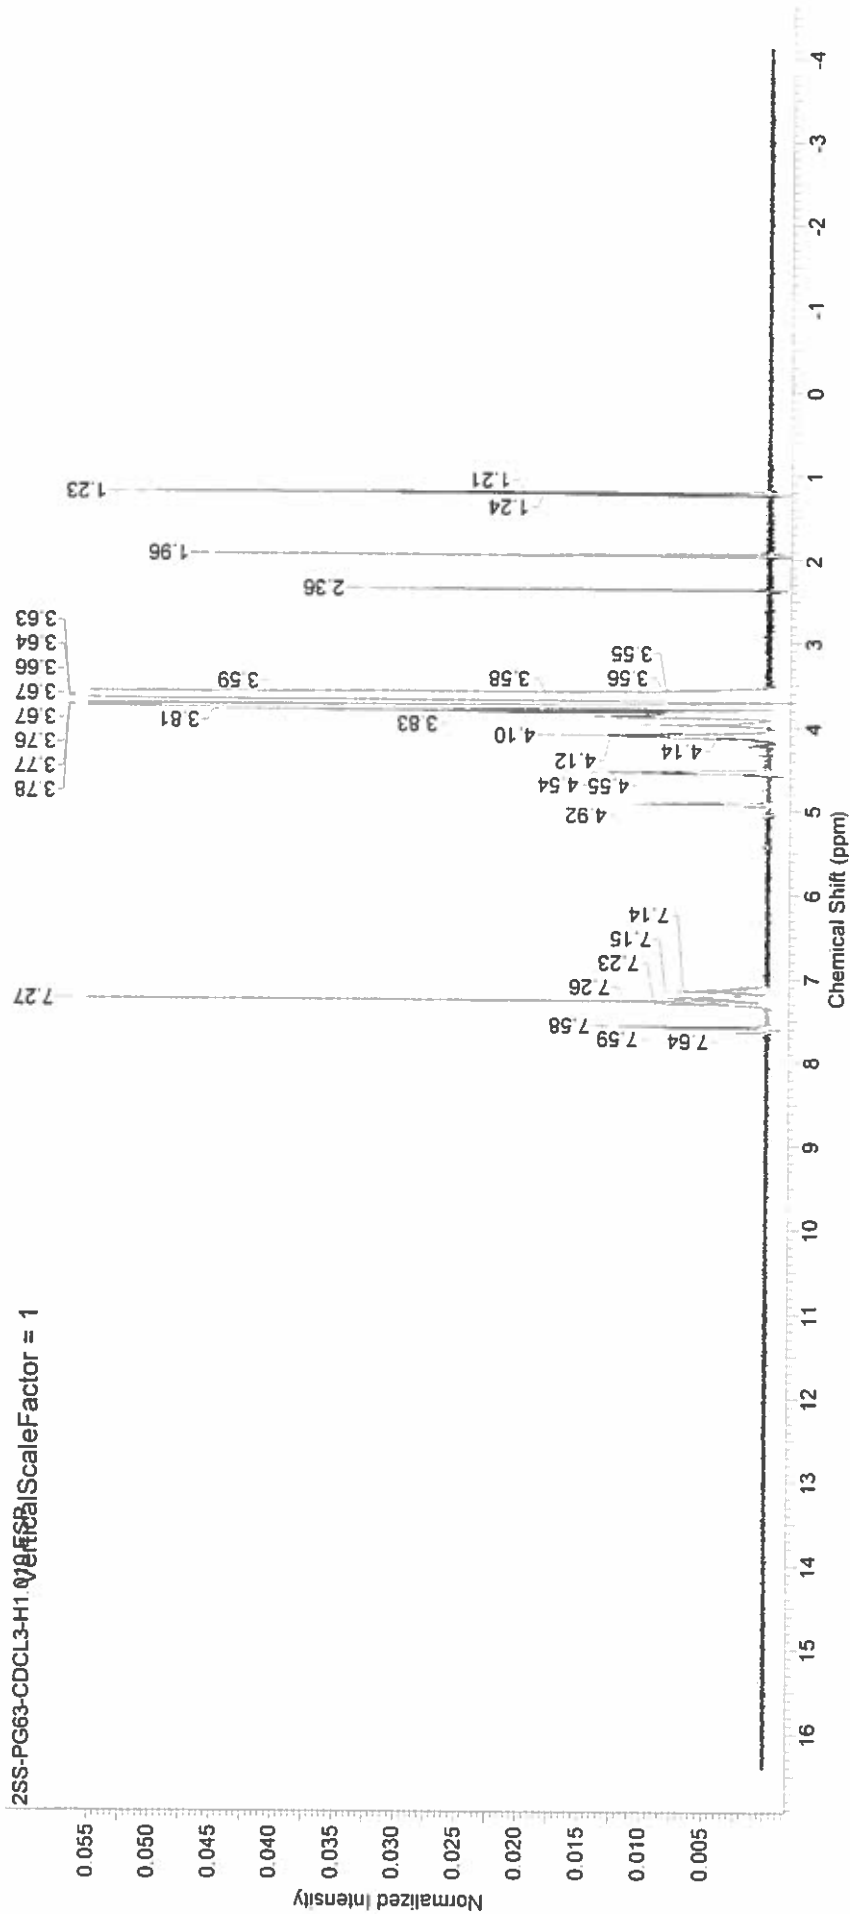

Formula  $C_{80}H_{70}Br_2N_{10}O_{15}$  FW 1331.0638

| File Name                                                         | Date                 | Date Stamp             |
|-------------------------------------------------------------------|----------------------|------------------------|
| C:\Documents and Settings\176831\Desktop\2SS-Pg63-CDCl3-C13\1\fid | 29 Jul 2012 17:34:24 | 29 Jul 2012 17:34:24   |
| Nucleus                                                           | Number of Transients | Original Points Count  |
| 13C                                                               | 3000                 | 32768                  |
| Owner                                                             | Points Count         | Receiver Gain          |
| nmisu                                                             | 32768                | 203.00                 |
| SW(cyclical) (Hz)                                                 | Solvent              | Spectrum Offset (Hz)   |
| 24038.46                                                          | CHLOROFORM-d         | 10062.0947             |
| Spectrum Type                                                     | Sweep Width (Hz)     | Temperature (degree C) |
| STANDARD                                                          | 24037.73             | 24.288                 |

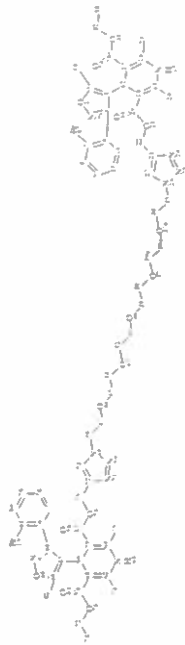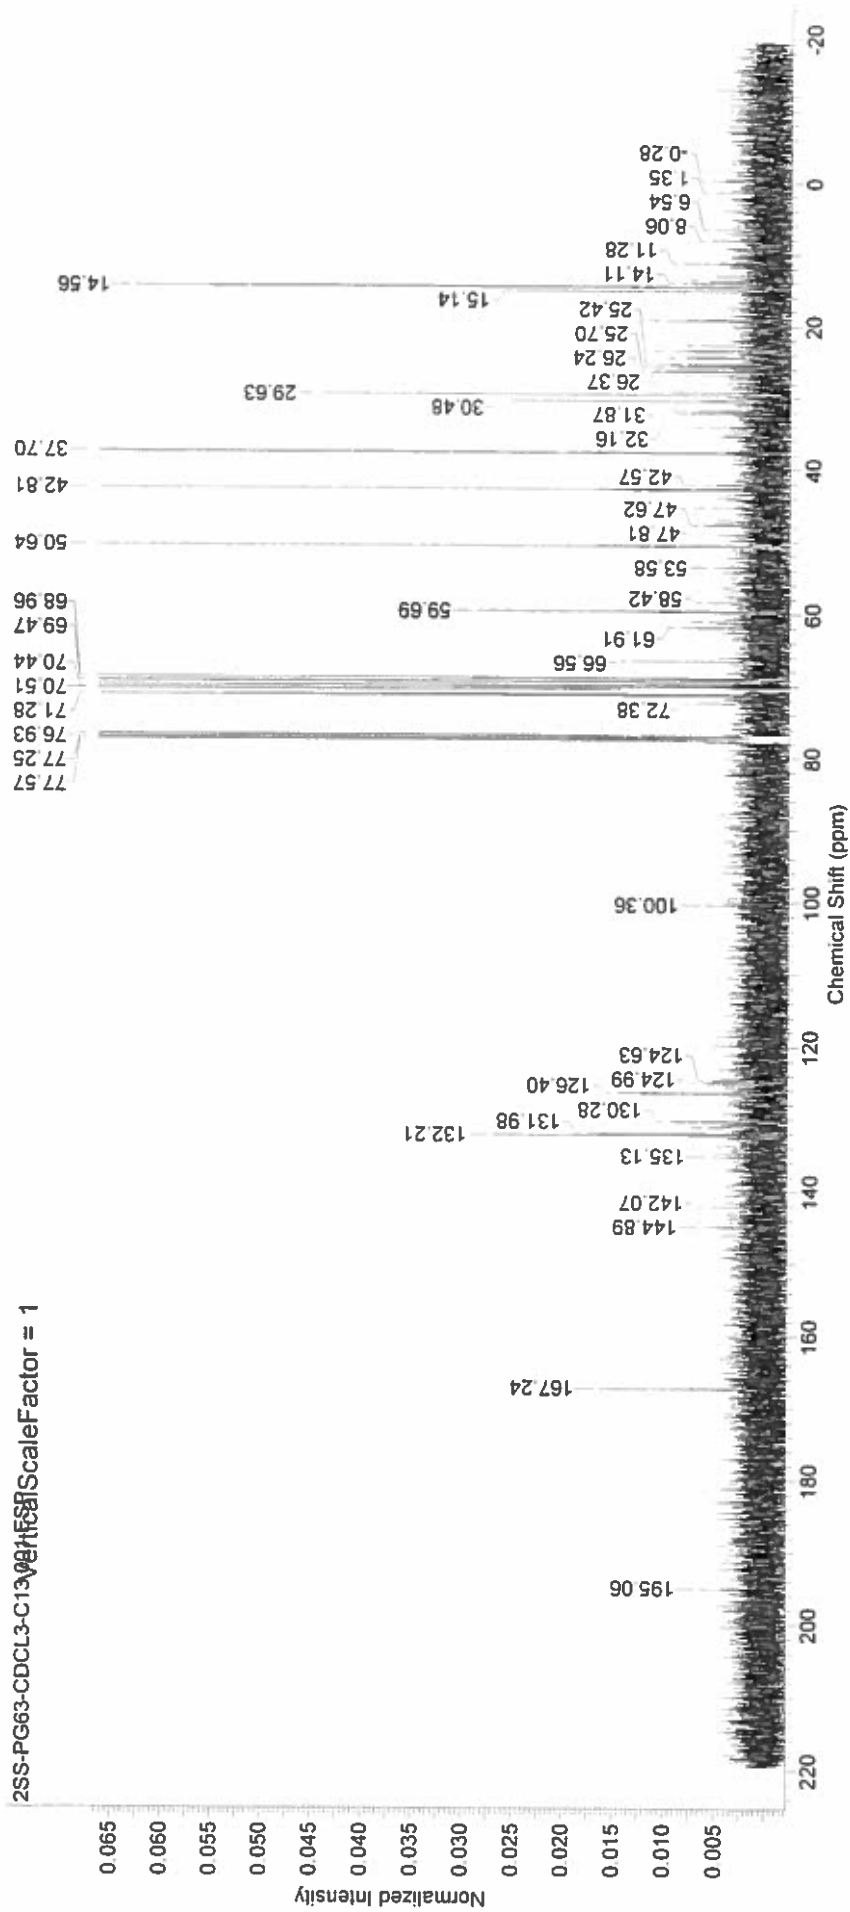

Formula  $C_{60}H_{70}Br_2N_{10}O_{15}$  FW 1331.0638

|                        |                                                                      |                        |                      |
|------------------------|----------------------------------------------------------------------|------------------------|----------------------|
| Acquisition Time (sec) | 3.9846                                                               | Date                   | 29 May 2012 16:53:52 |
| File Name              | C:\Documents and Settings\ss176831\Desktop\2SS-Pg123-3-CDCl3-H11\fid |                        |                      |
| Nucleus                | 1H                                                                   | Number of Transients   | 60                   |
| Owner                  | nmsu                                                                 | Points Count           | 32768                |
| SW(cyclical) (Hz)      | 8223.68                                                              | Solvent                | CHLOROFORM-d         |
| Spectrum Type          | STANDARD                                                             | Sweep Width (Hz)       | 8223.43              |
|                        |                                                                      | Temperature (degree C) | 22.504               |
| Date Stamp             | 29 May 2012 16:53:52                                                 |                        |                      |
| Frequency (MHz)        | 400.18                                                               |                        |                      |
| Original Points Count  | 32768                                                                |                        |                      |
| Receiver Gain          | 161.00                                                               |                        |                      |
| Spectrum Offset (Hz)   | 2460.2036                                                            |                        |                      |

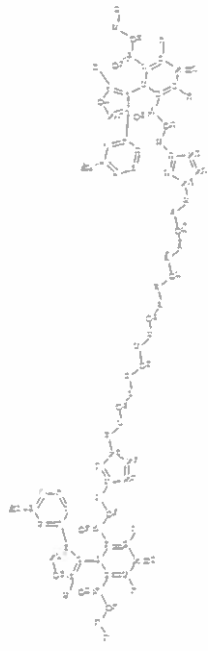

2SS-PG123-CDCl3-H11 VerticalScaleFactor = 1

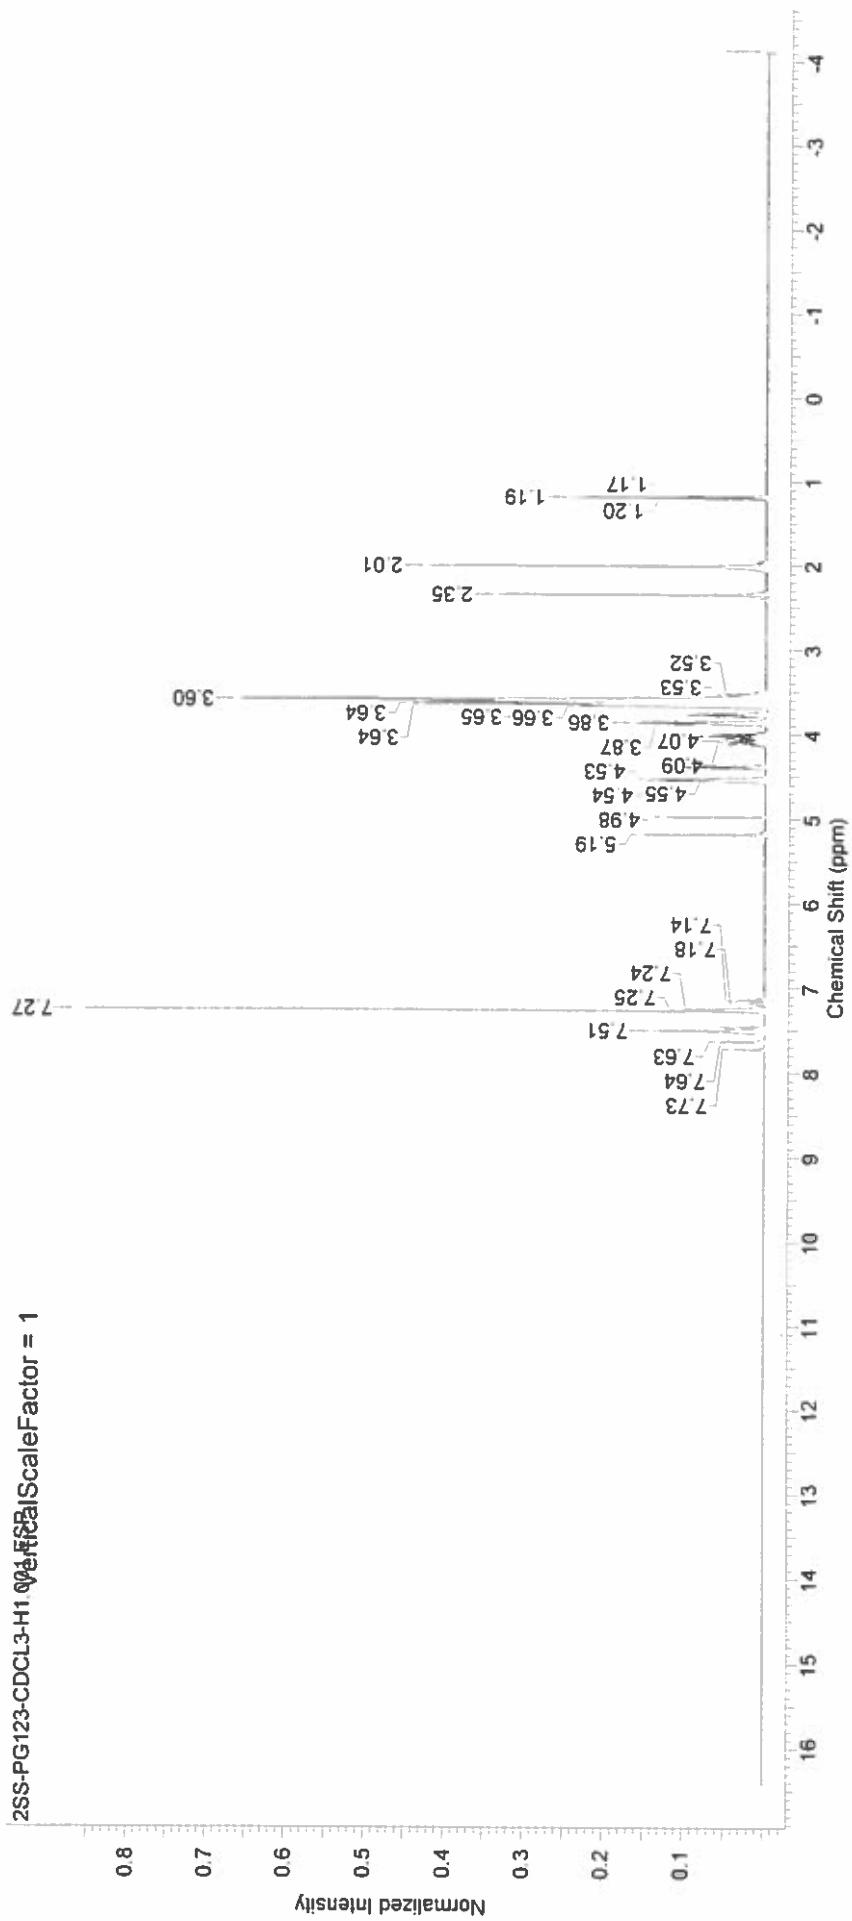

Formula  $C_{60}H_{70}Br_2N_{10}O_{15}$  FW 1331.0638

|                        |                                                                    |                        |                      |
|------------------------|--------------------------------------------------------------------|------------------------|----------------------|
| Acquisition Time (sec) | 1.3631                                                             | Date                   | 29 Jul 2012 20:31:28 |
| File Name              | C:\Documents and Settings\ss176831\Desktop\SS-Pg145-CDCl3-C131\fid |                        |                      |
| Nucleus                | 13C                                                                | Number of Transients   | 3000                 |
| Owner                  | nmsu                                                               | Points Count           | 32768                |
| SW(cyclical) (Hz)      | 24038.46                                                           | Solvent                | CHLOROFORM-d         |
| Spectrum Type          | STANDARD                                                           | Sweep Width (Hz)       | 24037.73             |
|                        |                                                                    | Temperature (degree C) | 25.698               |

|                       |                      |
|-----------------------|----------------------|
| Date Stamp            | 29 Jul 2012 20:31:28 |
| Frequency (MHz)       | 100.63               |
| Original Points Count | 32768                |
| Receiver Gain         | 203.00               |
| Spectrum Offset (Hz)  | 10062.0947           |

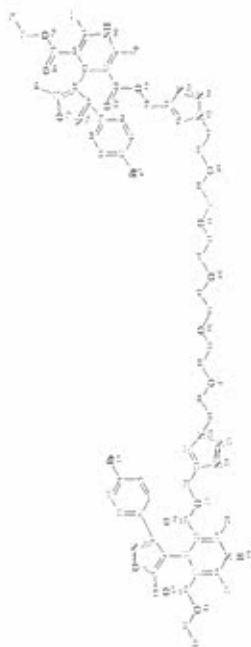

2SS-PG107-CDCl3-C131\SS176831\ScaleFactor = 1

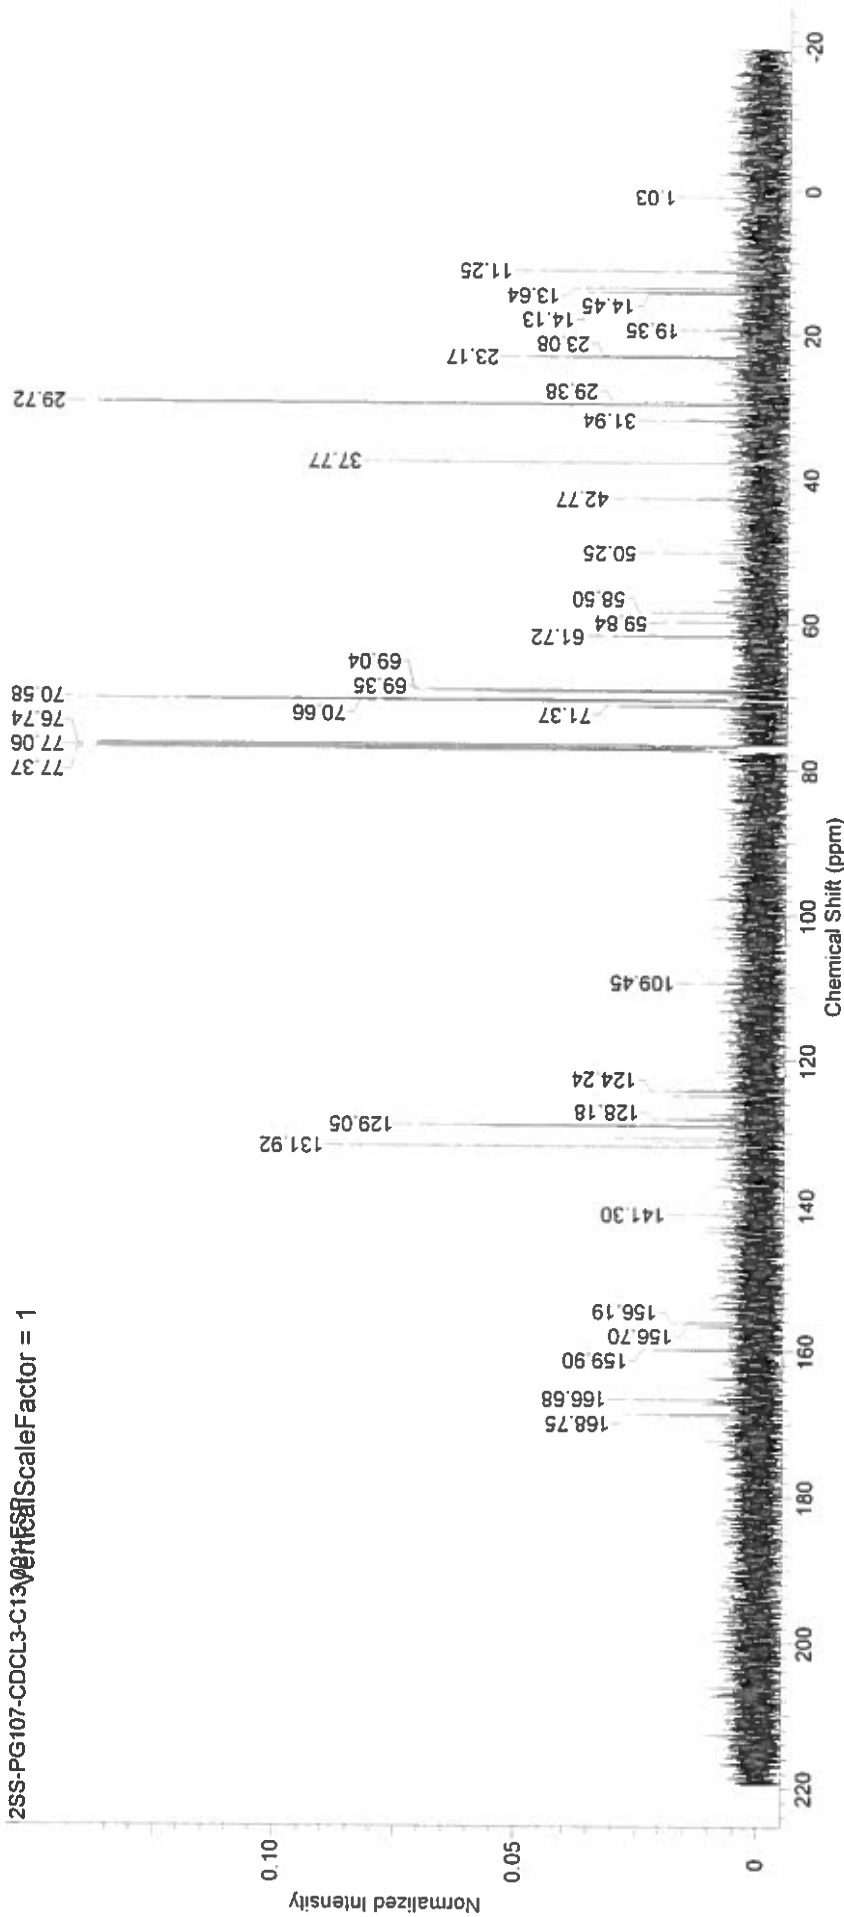

Formula  $C_{32}H_{32}BrN_3O_5$  FW 646.5310

|                        |                                                                        |                      |                      |                        |                      |
|------------------------|------------------------------------------------------------------------|----------------------|----------------------|------------------------|----------------------|
| Acquisition Time (sec) | 3.9846                                                                 | Date                 | 19 Jul 2012 16:51:44 | Date Stamp             | 19 Jul 2012 16:51:44 |
| File Name              | C:\Documents and Settings\ss176831\Desktop\2SS-Pg175-16-CDCl3-H11\1fid |                      |                      |                        |                      |
| Nucleus                | 1H                                                                     | Number of Transients | 30                   | Origin                 | spect                |
| Owner                  | nmsu                                                                   | Points Count         | 32768                | Pulse Sequence         | zg30                 |
| SW(cyclical) (Hz)      | 8223.68                                                                | Solvent              | CHLOROFORM-d         | Spectrum Offset (Hz)   | 2459.9524            |
| Spectrum Type          | STANDARD                                                               | Sweep Width (Hz)     | 8223.43              | Temperature (degree C) | 23.818               |

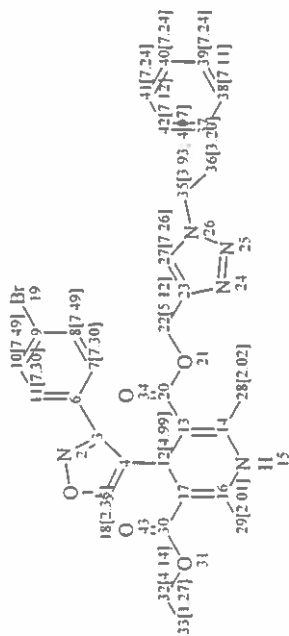

2SS-PG179-CDCl3-H1 004.F161 ScaleFactor = 1

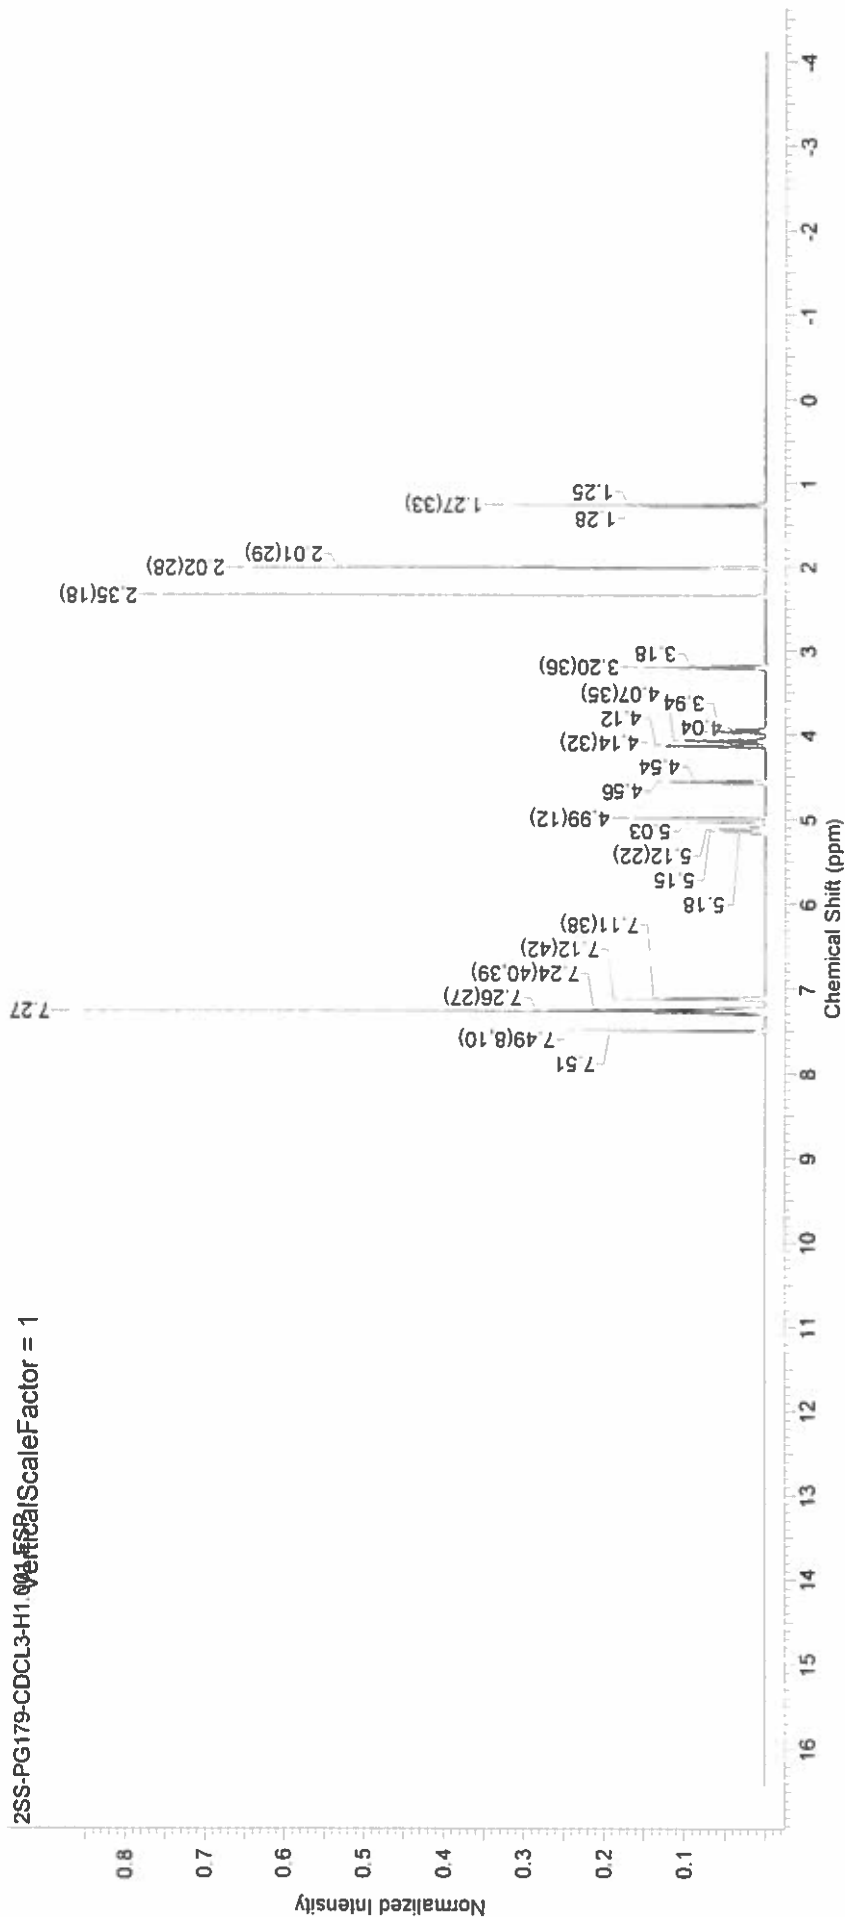

|                        |                                                                             |                        |                      |
|------------------------|-----------------------------------------------------------------------------|------------------------|----------------------|
| Formula                | C <sub>32</sub> H <sub>12</sub> BrN <sub>3</sub> O <sub>5</sub>             | FW                     | 646.5310             |
| Acquisition Time (sec) | 1.3631                                                                      | Date                   | 20 Jul 2012 10:40:32 |
| File Name              | C:\Documents and Settings\ss176831\Desktop\2SS-Pg175-16-CDCl3-C131\data\11r |                        |                      |
| Nucleus                | 13C                                                                         | Number of Transients   | 1024                 |
| Owner                  | nmsu                                                                        | Points Count           | 32768                |
| SW(cyclical) (Hz)      | 24038.46                                                                    | Solvent                | CHLOROFORM-d         |
| Spectrum Type          | STANDARD                                                                    | Sweep Width (Hz)       | 24037.73             |
|                        |                                                                             | Temperature (degree C) | 23.895               |

|                       |                      |
|-----------------------|----------------------|
| Date Stamp            | 20 Jul 2012 10:40:32 |
| Frequency (MHz)       | 100.63               |
| Original Points Count | 32768                |
| Receiver Gain         | 203.00               |
| Spectrum Offset (Hz)  | 10062.0947           |

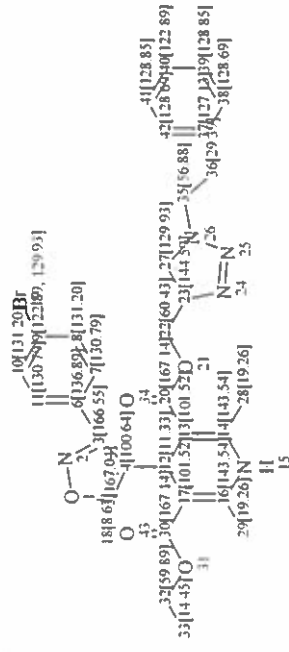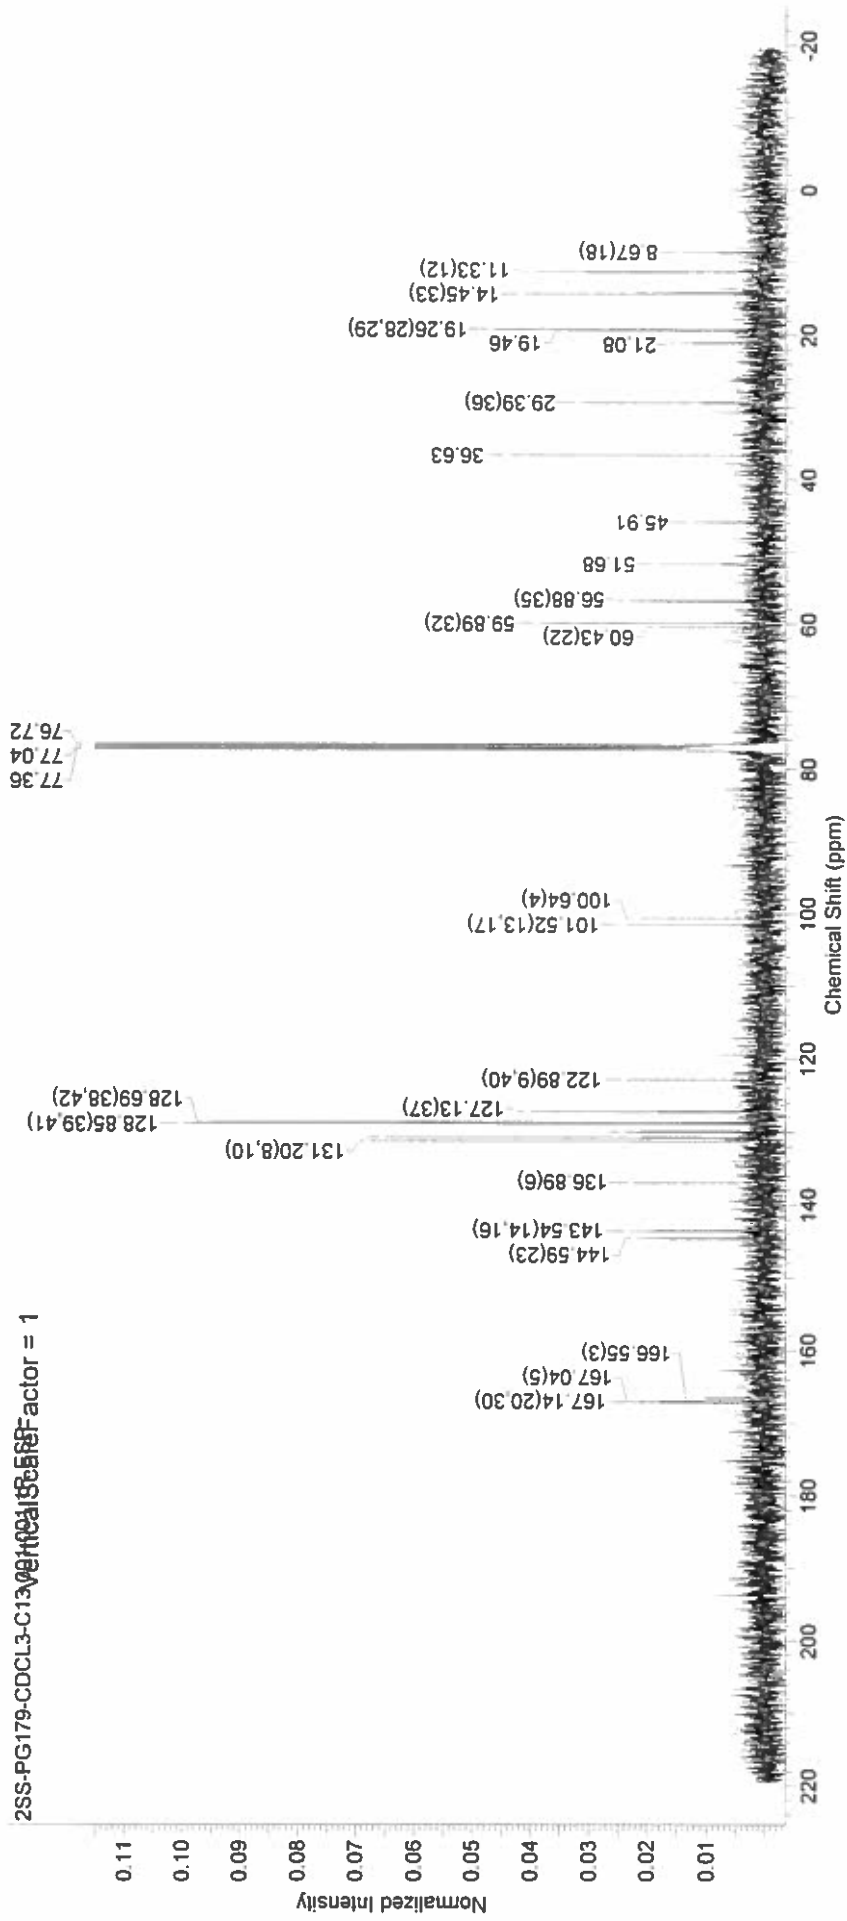

Formula C<sub>23</sub>H<sub>24</sub>N<sub>2</sub>O<sub>3</sub> FW 408.4471

|                        |                                                                    |                      |                      |                        |                      |
|------------------------|--------------------------------------------------------------------|----------------------|----------------------|------------------------|----------------------|
| Acquisition Time (sec) | 3.9846                                                             | Date                 | 02 Oct 2012 12:01:36 | Date Stamp             | 02 Oct 2012 12:01:36 |
| File Name              | C:\Documents and Settings\ss176831\Desktop\2SS-Pg191-CDCI3-H11\fid |                      |                      |                        |                      |
| Nucleus                | 1H                                                                 | Number of Transients | 100                  | Origin                 | spect                |
| Owner                  | nmsu                                                               | Points Count         | 32768                | Pulse Sequence         | zg30                 |
| SW(cyclical) (Hz)      | 8223.68                                                            | Solvent              | CHLOROFORM-d         | Receiver Gain          | 32.00                |
| Spectrum Type          | STANDARD                                                           | Sweep Width (Hz)     | 8223.43              | Temperature (degree C) | 22.431               |
|                        |                                                                    |                      |                      | Spectrum Offset (Hz)   | 2457.4426            |

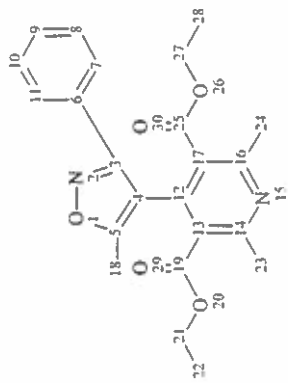

2SS-Pg191-CDCI3-H1.00\VerticalScaleFactor = 1

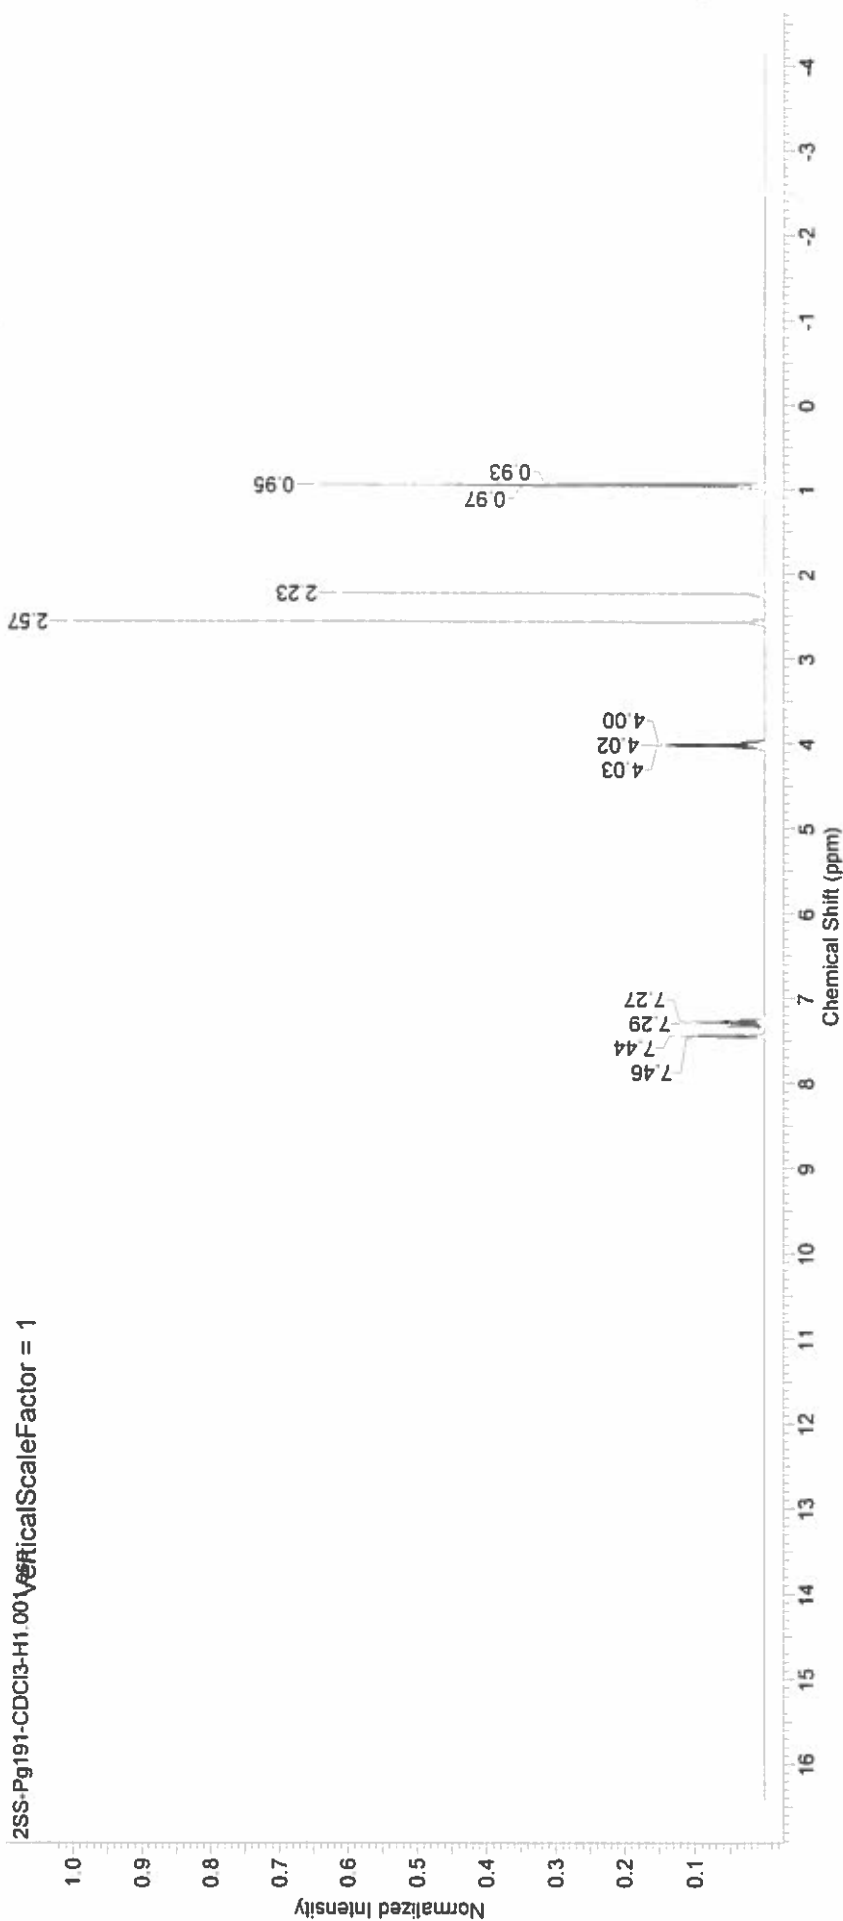

|                        |                                                                         |                        |                      |
|------------------------|-------------------------------------------------------------------------|------------------------|----------------------|
| Formula                | C <sub>23</sub> H <sub>21</sub> N <sub>2</sub> O <sub>5</sub>           | FW                     | 408.4471             |
| Acquisition Time (sec) | 1.3631                                                                  | Date                   | 03 Oct 2012 00:06:56 |
| File Name              | C:\Documents and Settings\176831\Desktop\2SS-Pg191-CDC13-C1311\data\11r |                        |                      |
| Nucleus                | 13C                                                                     | Number of Transients   | 2000                 |
| Owner                  | nmsu                                                                    | Points Count           | 32768                |
| SW(cyclical) (Hz)      | 24038.46                                                                | Solvent                | CHLOROFORM-d         |
| Spectrum Type          | STANDARD                                                                | Sweep Width (Hz)       | 24037.73             |
|                        |                                                                         | Temperature (degree C) | 23.408               |

|                       |                      |
|-----------------------|----------------------|
| Date Stamp            | 03 Oct 2012 00:06:56 |
| Frequency (MHz)       | 100.63               |
| Original Points Count | 32768                |
| Receiver Gain         | 203.00               |
| Spectrum Offset (Hz)  | 9959.1572            |

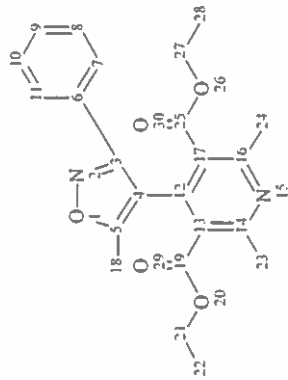

2SS-Pg191-CDC13-C13.001  
 AcquisitionScaleFactor = 1

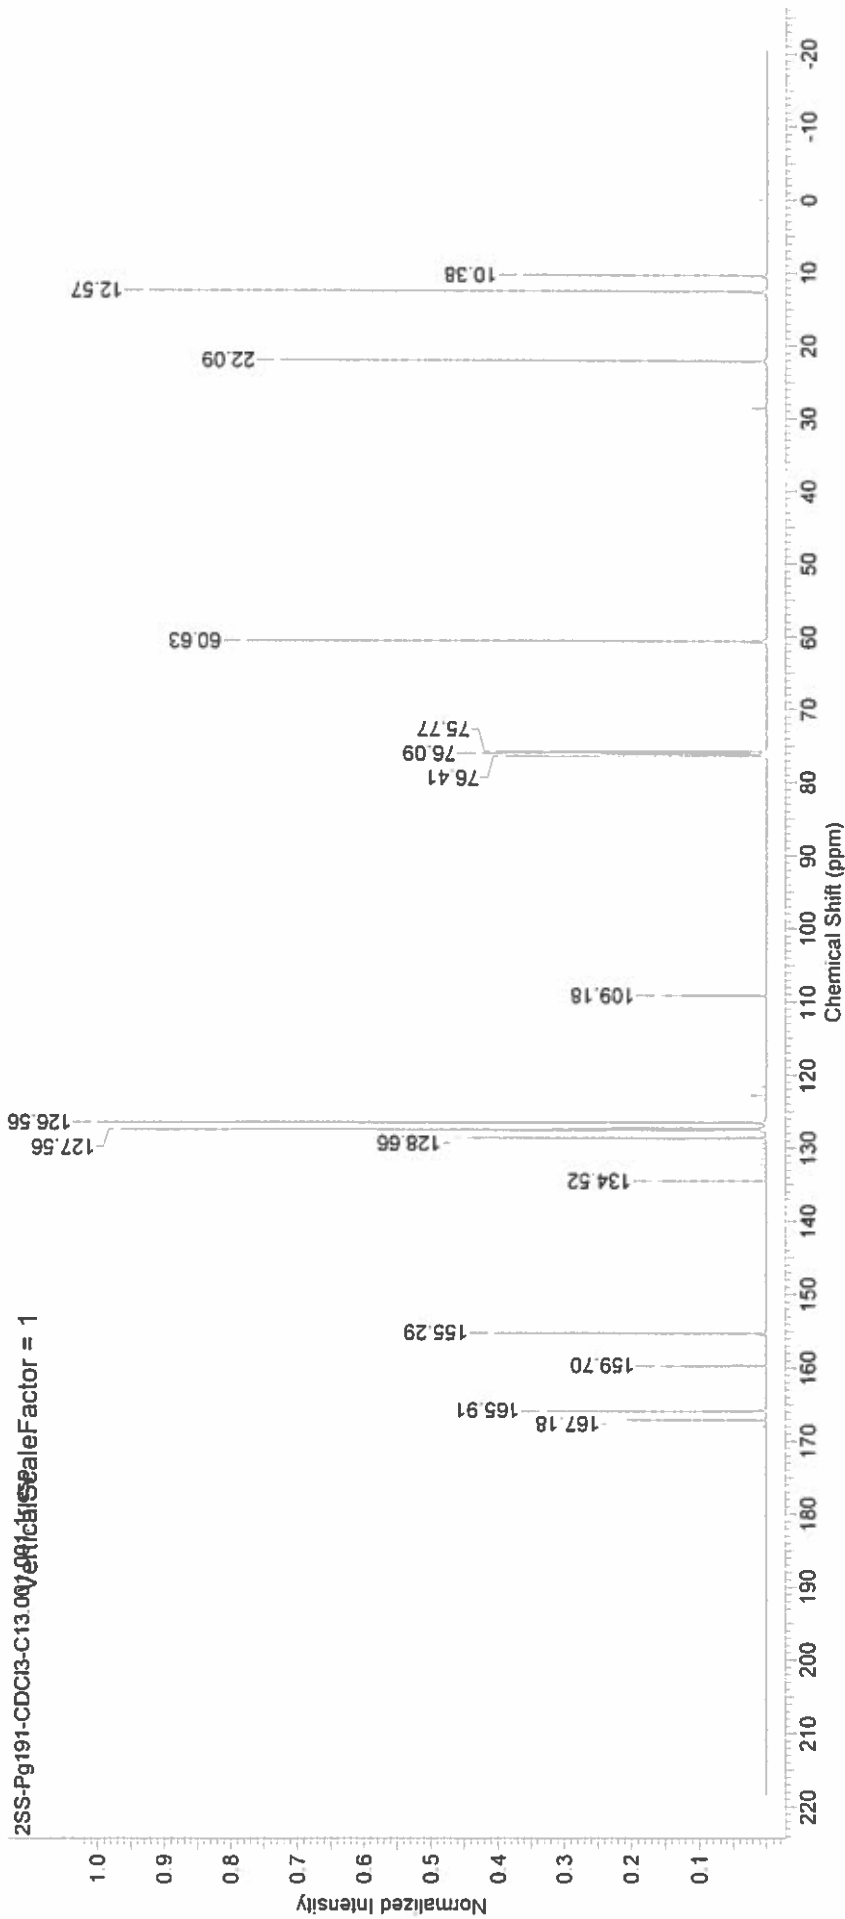

Supplement: NIHMS870327-supplement-2.pdf [file NIHMS870327-supplement-2.pdf]
